# Supplementary material for: A small number of residual teeth after the mandibular resection of oral cancer is associated with titanium reconstruction plate exposure
Source: PubMed Central journal article supplement (PMC6820575; doi:10.1002/cre2.208), 2019-06-07
Supplement: CRE2-5-469-s001.pdf [file CRE2-5-469-s001.pdf]

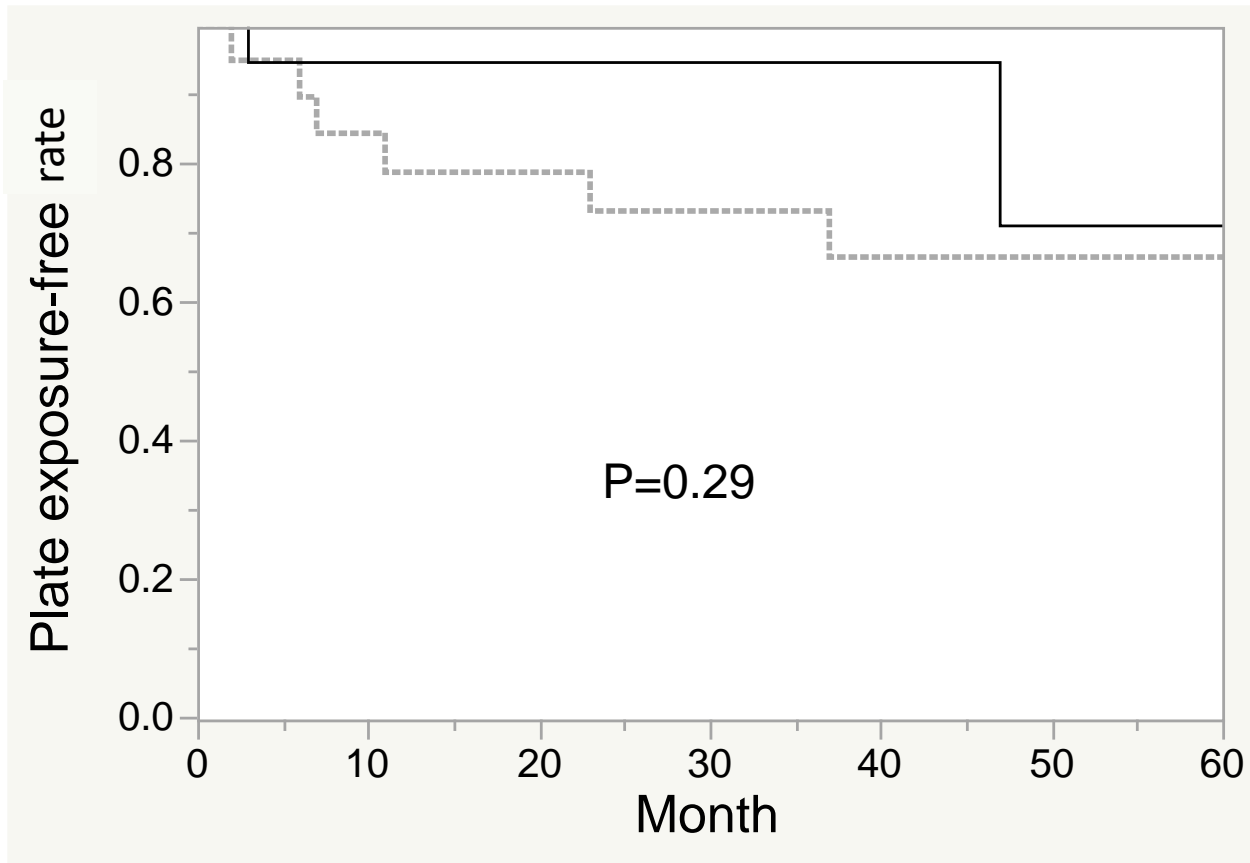

0.71  $65 \leq$  years  
0.66 years < 65

Figure S1

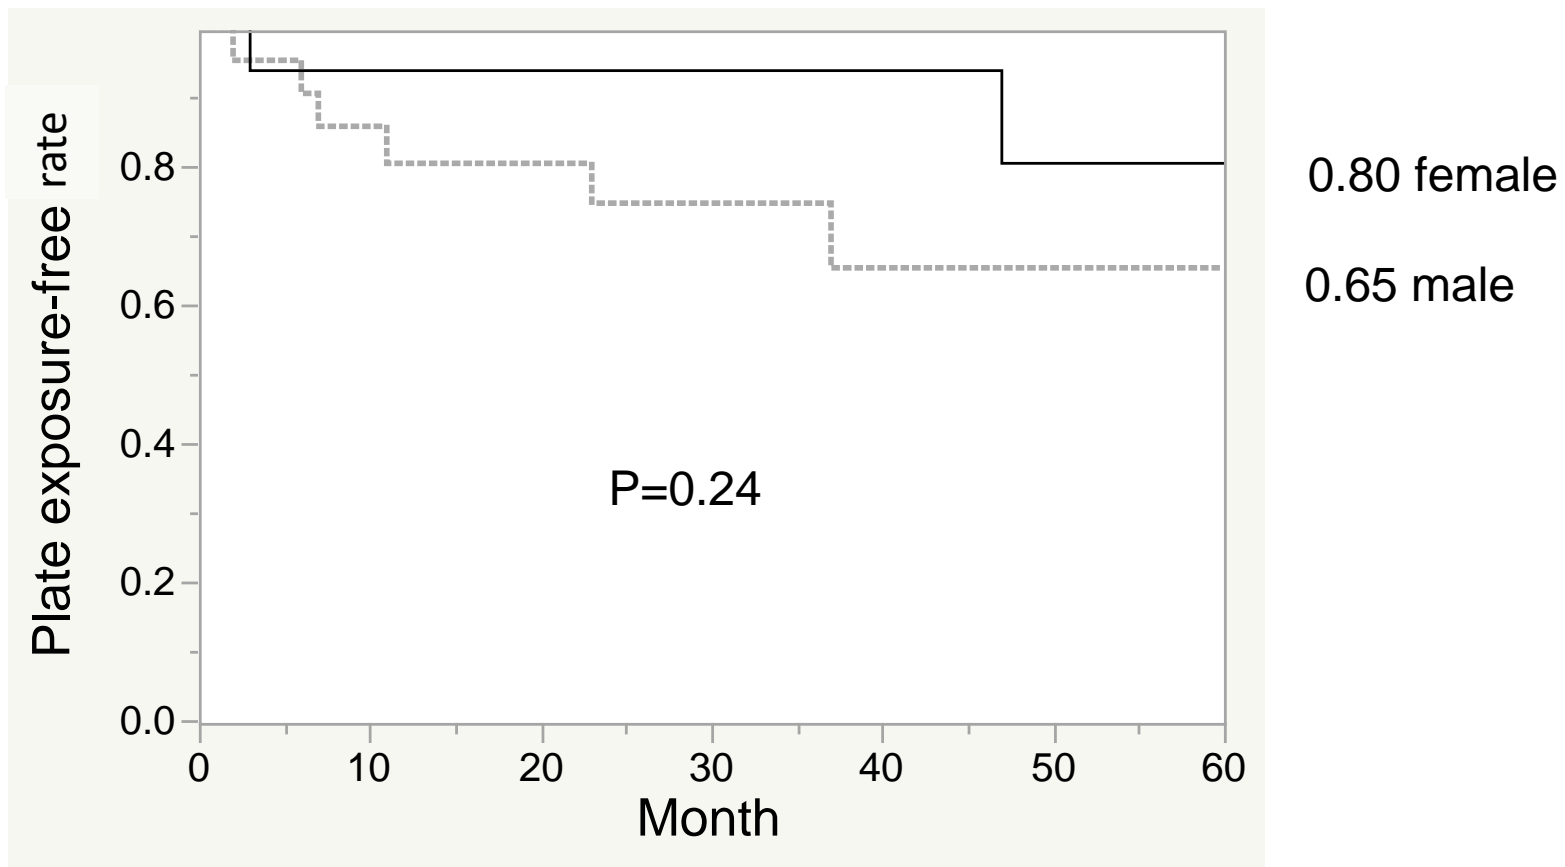

Figure S2

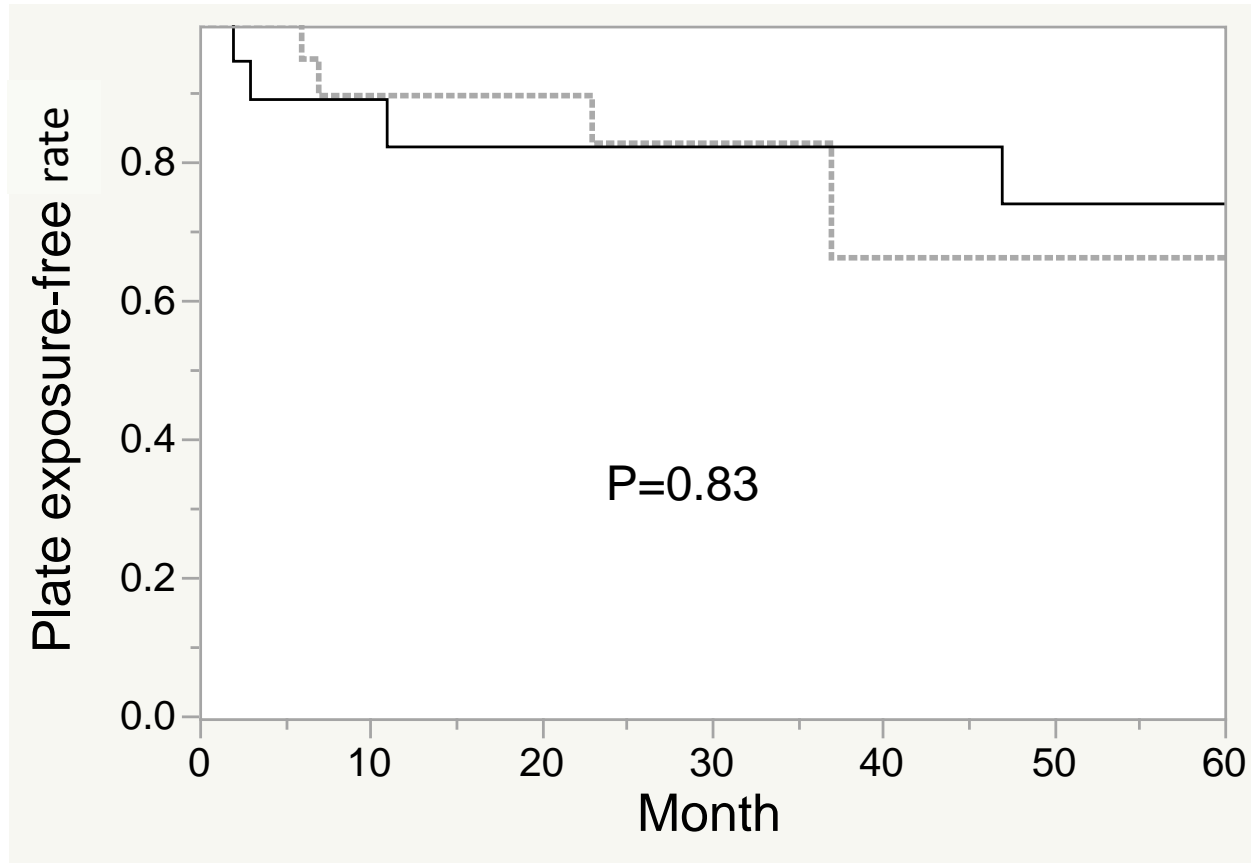

Figure S3

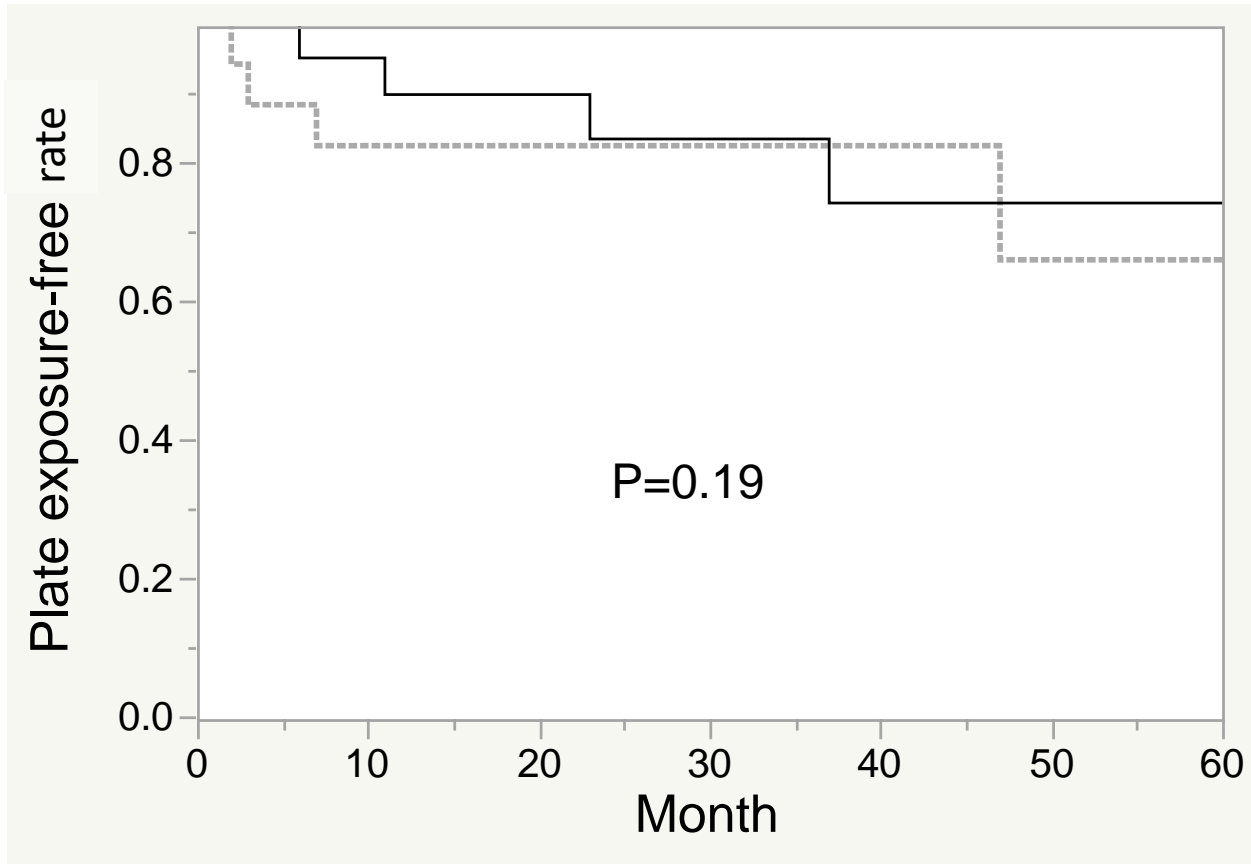

**Figure S4**

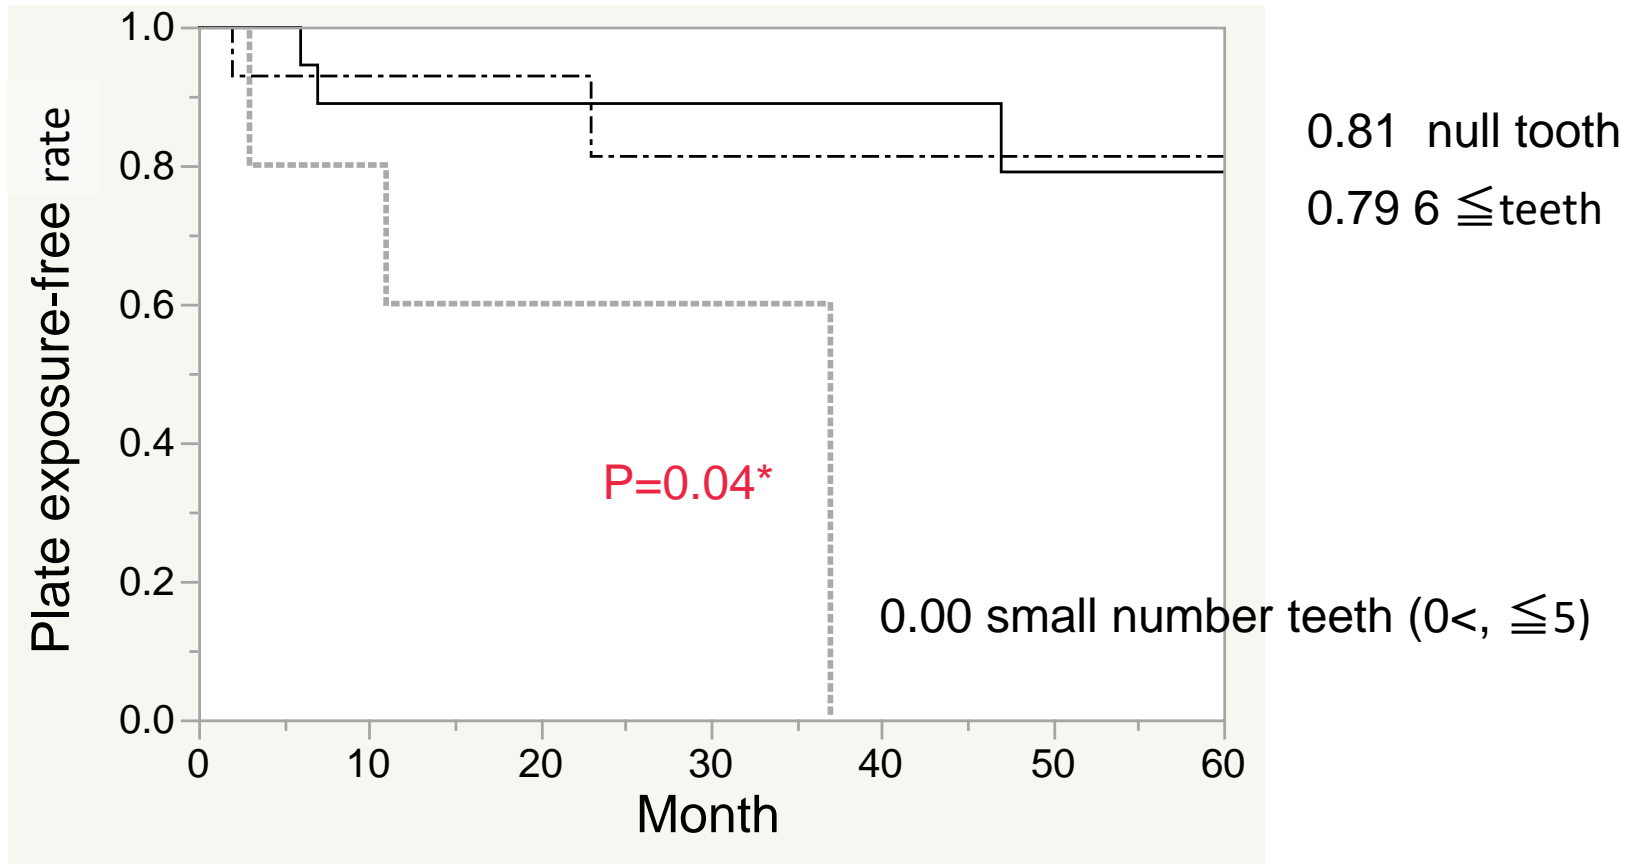

Figure S5

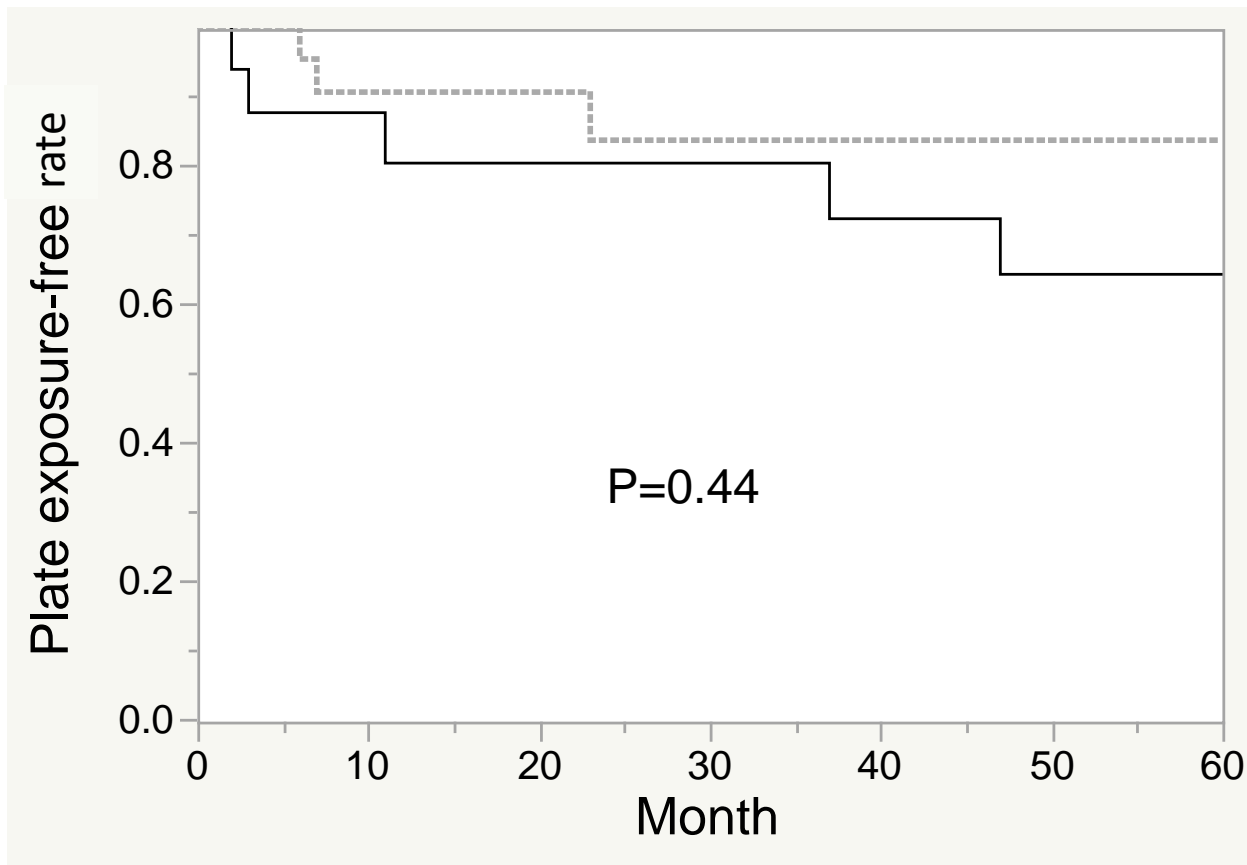

0.84 Biomet  
+ Synthes  
0.64 Modus

Figure S6

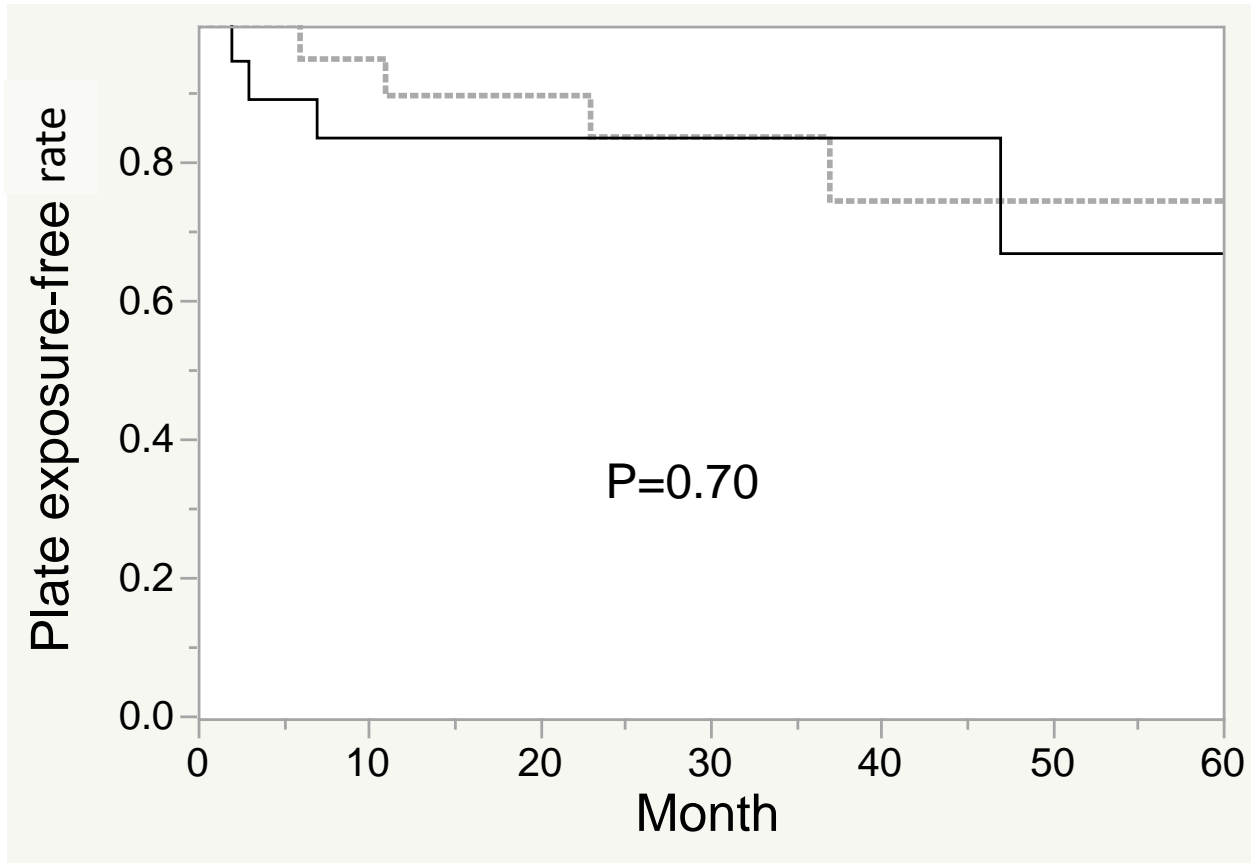

Fibular free flap  
0.74

The others  
0.67

Figure S7

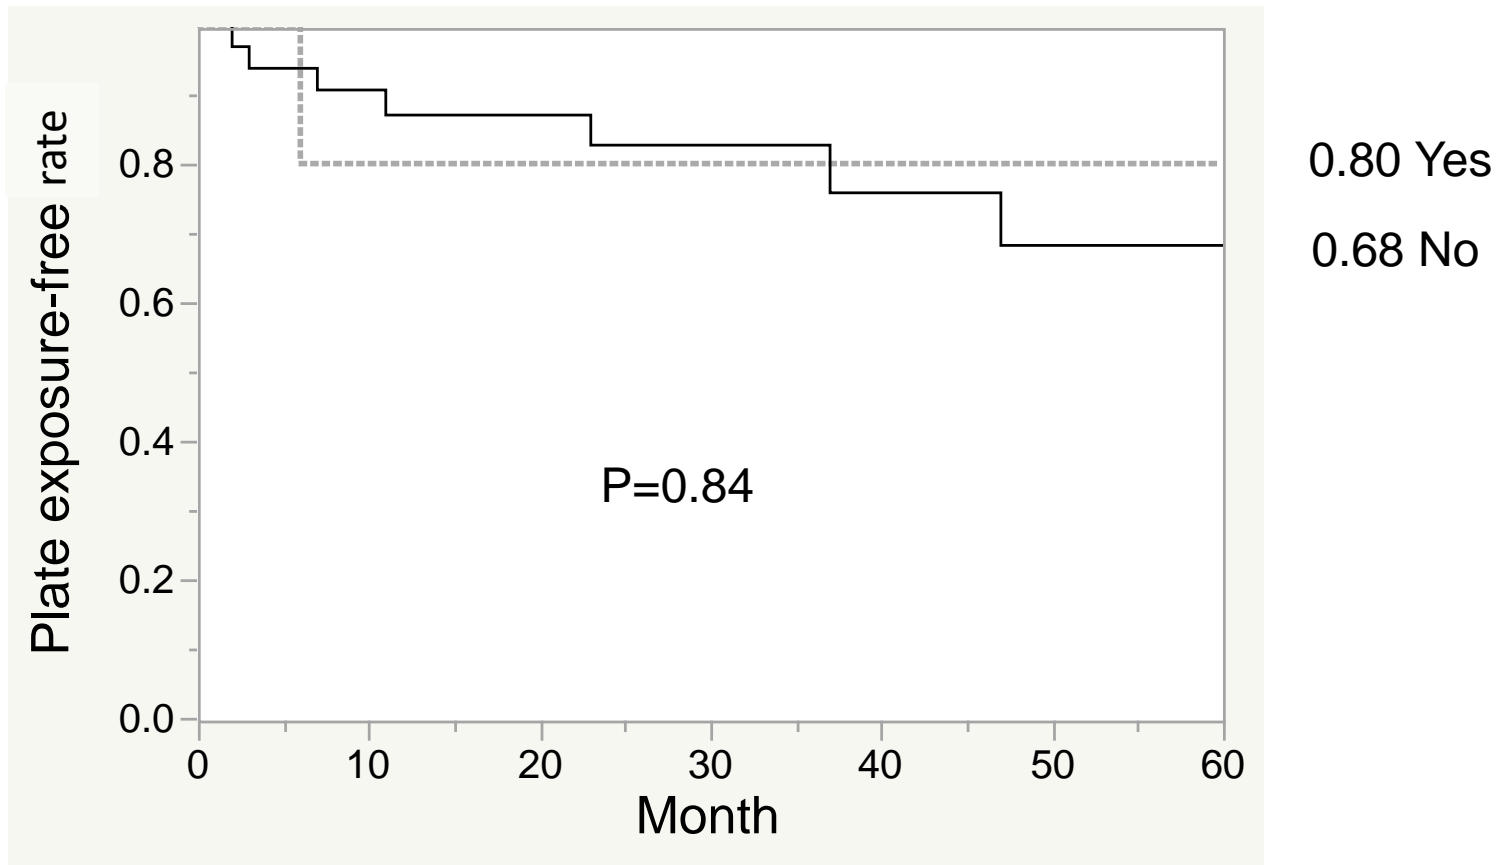

Figure S8



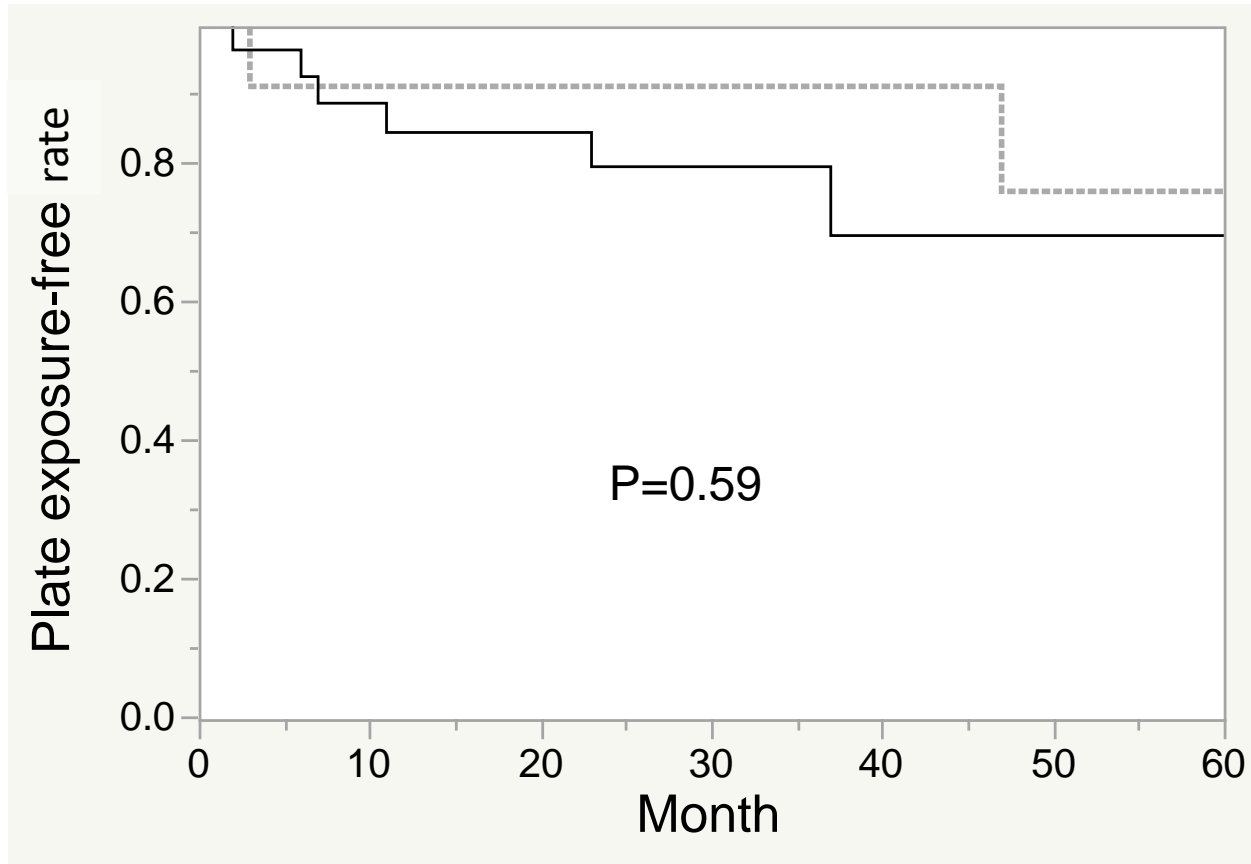

0.76 Stage I - III  
0.69 Stage IVa,b

Figure S9

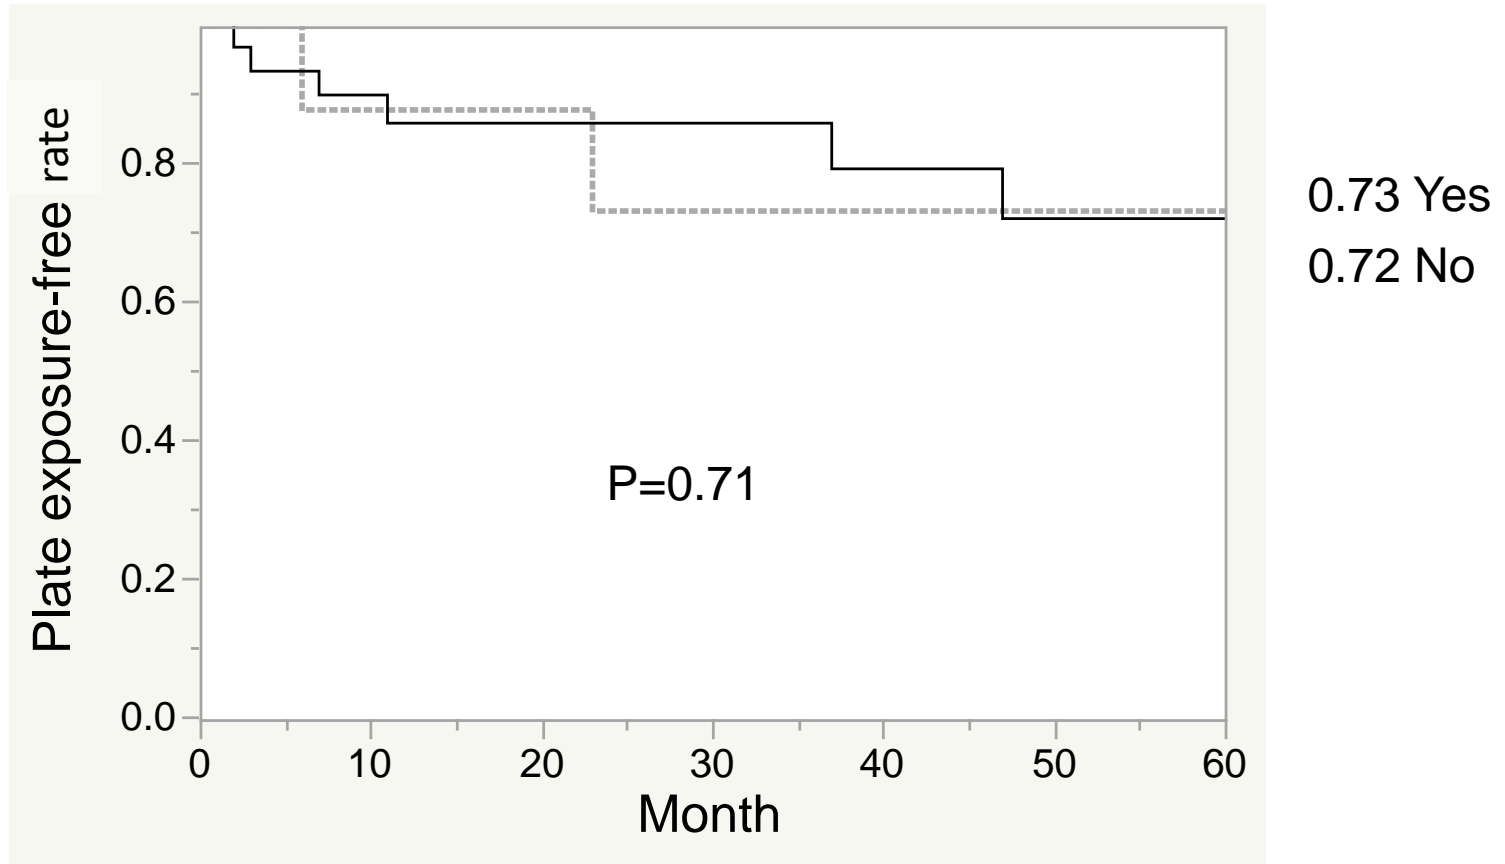

Figure S10

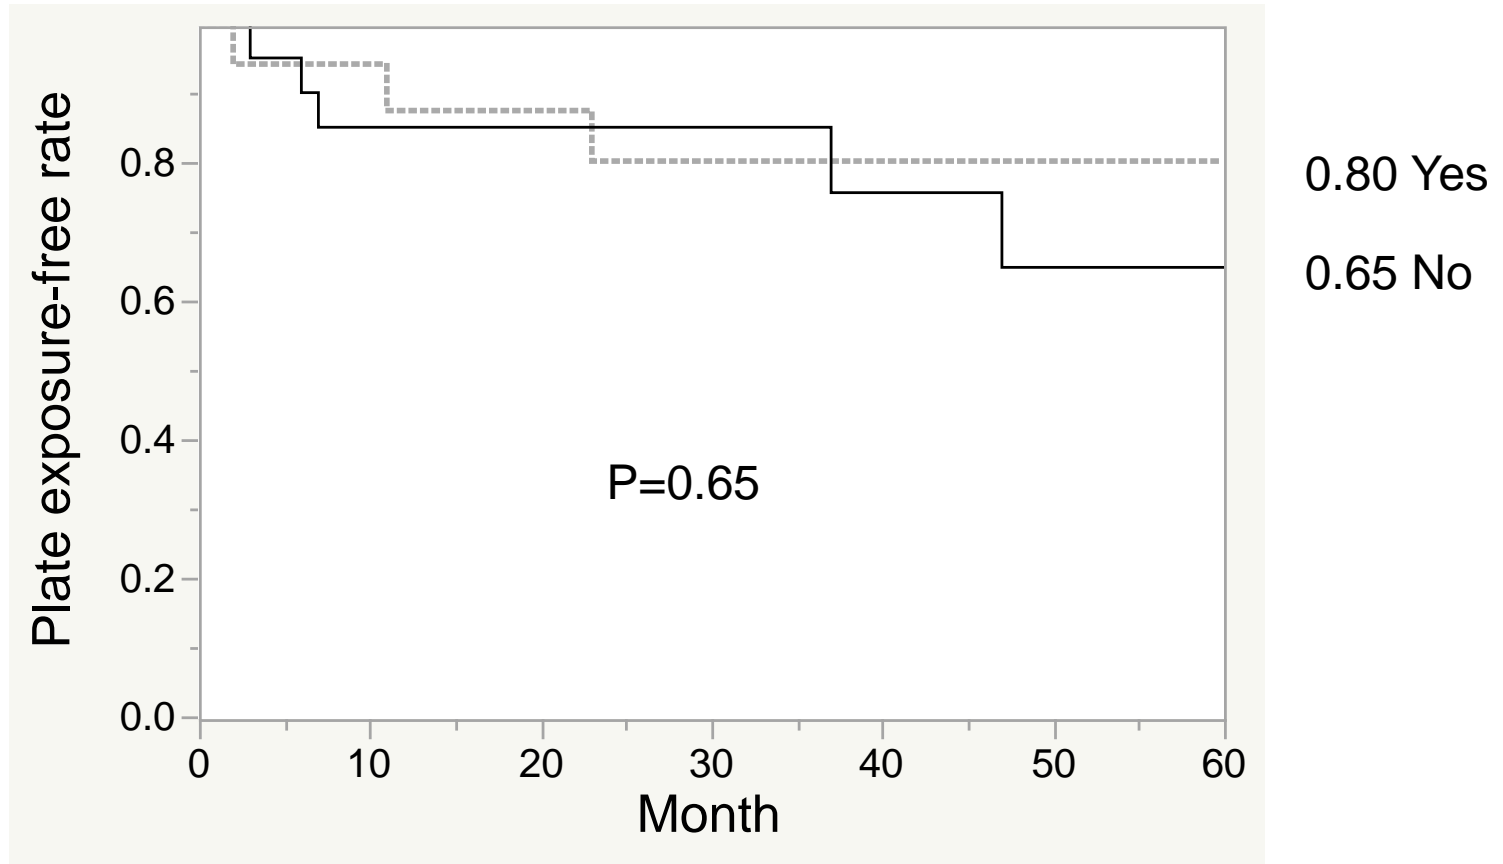

Figure S11

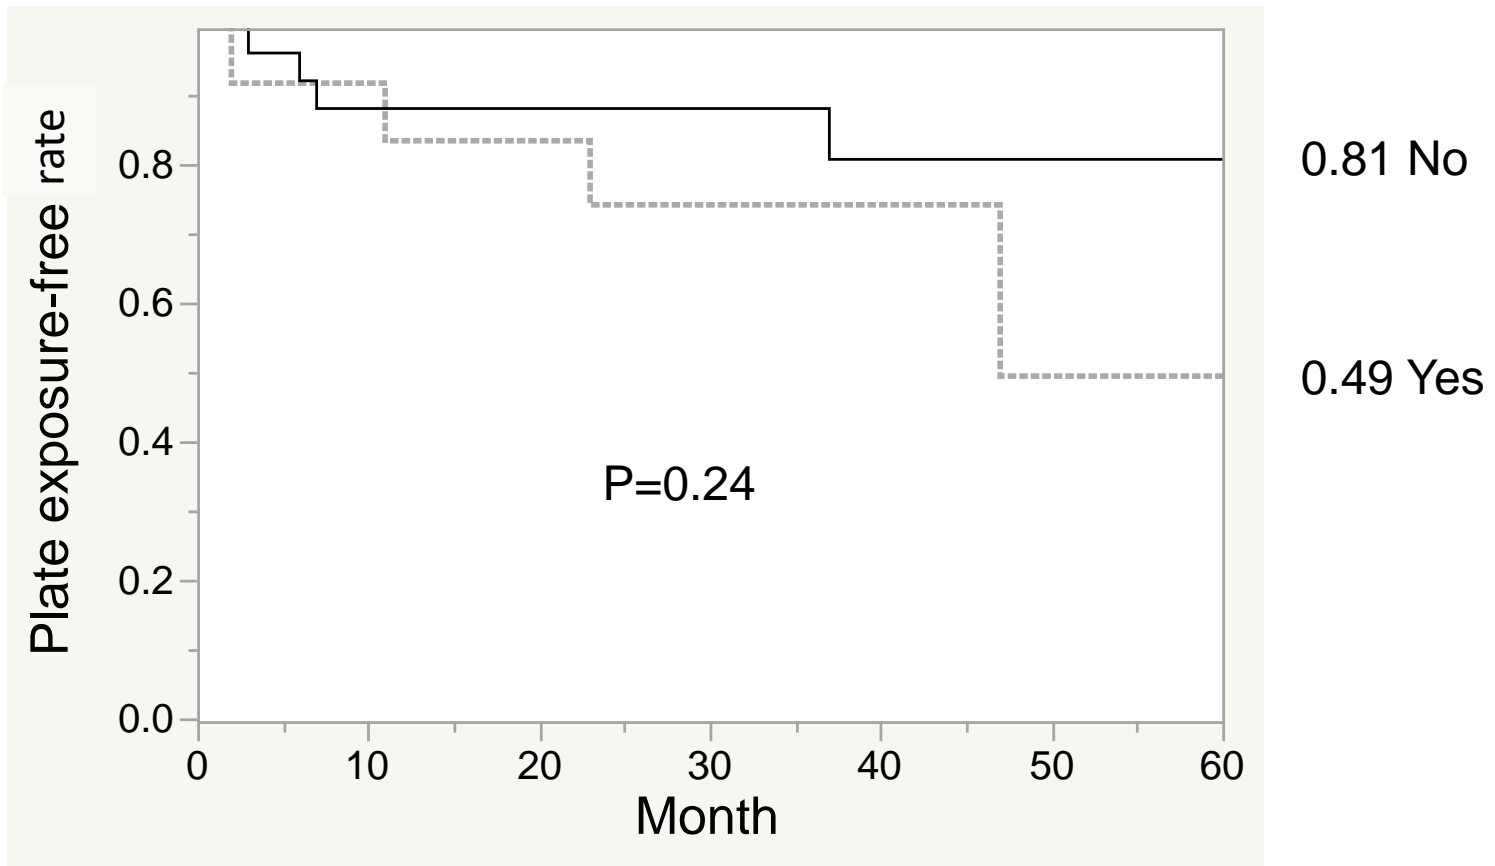

Figure S12

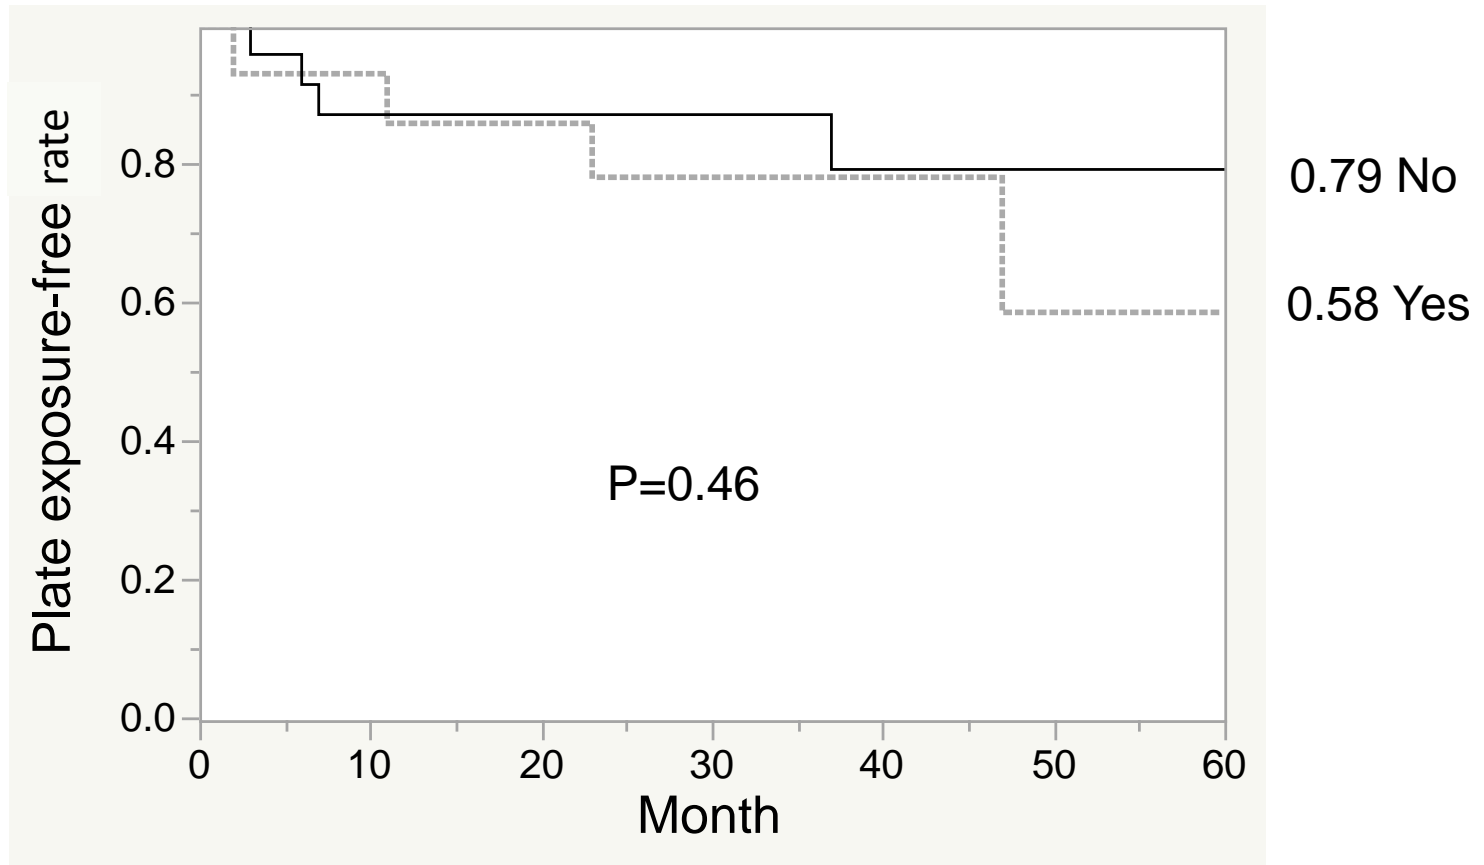

Figure S13
